# Supplementary material for: The Association between Serum Serine and Glycine and Related-Metabolites with Pancreatic Cancer in a Prospective Cohort Study
Source: MDPI journal article supplement (doi:10.3390/cancers14092199), 2022-04-28
Supplement: s1 [file s1]

# Supplementary Materials: The Association between Serum Serine and Glycine and Related-Metabolites with Pancreatic Cancer in a Prospective Cohort Study

Hung N. Luu, Pedram Paragomi, Renwei Wang, Joyce Y. Huang, Jennifer Adams-Haduch, Øivind Midttun, Arve Ulvik, Tin C. Nguyen, Randall E. Brand, Yutang Gao, Per Magne Ueland and Jian-Min Yuan

**Table S1.** Within-batch and Between-batch Coefficients of Variations (CV) of Biomarkers ( $N = 14$ ).

| Biomarkers ( $\mu\text{mol/L}$ ) | Within-batch CV, % | Between-batch CV, % |
|----------------------------------|--------------------|---------------------|
| Serine                           | 0.7                | 2.0                 |
| Glycine                          | 1.0                | 2.1                 |
| Cystathionine                    | 1.4                | 1.9                 |
| Cysteine                         | 5.0                | 2.6                 |
| Sarcosine                        | 0.6                | 1.3                 |

**Table S2.** Spearman Correlation Coefficients Between Serum Biomarkers and Selected Sociodemographic Characteristics among all Control Subjects, Shanghai Cohort Study ( $n = 258$ ).

| Selected variables                  | Serine | Glycine | Cystathionine | Cysteine | Sarcosine |
|-------------------------------------|--------|---------|---------------|----------|-----------|
| Age (years)                         | −0.10  | −0.05   | 0.15*         | 0.19*    | 0.12      |
| Body mass index ( $\text{kg/m}^2$ ) | −0.10  | −0.18*  | 0.11          | 0.22*    | −0.04     |
| Smoking status                      | 0.10   | 0.14*   | −0.12*        | −0.18*   | 0.09      |
| Alcohol drinking status             | −0.12  | 0.03    | −0.16*        | −0.15*   | 0.15*     |
| Level of education                  | −0.04  | −0.04   | 0.03          | 0.13*    | −0.03     |
| History of diabetes                 | 0.04   | 0.11    | −0.05         | −0.07    | −0.07     |
| Serum cotinine ( $\text{nmol/L}$ )  | 0.08   | 0.12    | −0.12         | −0.16*   | 0.14*     |
| eGFR ( $\text{mL/min/1.73m}^2$ )    | 0.09   | −0.07   | −0.29**       | −0.37**  | −0.17*    |
| PLP ( $\text{nmol/L}$ )             | −0.21* | −0.26** | 0.01          | 0.26**   | −0.03     |
| Total methyl donors                 | 0.40** | 0.33**  | 0.20*         | 0.01     | 0.34**    |

Abbreviations: eGFR, estimated glomerular filtration rate; PLP, pyridoxal 5'-phosphate, \* $P < 0.05$ , \*\* $P < 0.001$ .

**Table S3.** Spearman Correlation Coefficients of Serum Biomarkers among all Control Subjects of the Shanghai Cohort Study ( $n = 258$ ).

| Biomarkers ( $\mu\text{mol/L}$ ) | Serine | Glycine      | Cysteine | Cystathione | Sarcosine    |
|----------------------------------|--------|--------------|----------|-------------|--------------|
| Serine                           | 1.00   | <b>0.59*</b> | −0.04    | 0.06        | 0.10         |
| Glycine                          |        | 1.00         | −0.05    | 0.01        | 0.12         |
| Cysteine                         |        |              | 1.00     | −0.02       | −0.01        |
| Cystathione                      |        |              |          | 1.00        | <b>0.27*</b> |
| Sarcosine                        |        |              |          |             | 1.00         |

\* $P < 0.001$ .

**Table S4.** Full Models between Serine, Glycine and other Co-variables in relation to Pancreatic Cancer Risk.

| Variable                              | OR (95% CI)             |
|---------------------------------------|-------------------------|
| Serine                                | 0.78 (0.60–1.03)        |
| Glycine                               | <b>0.69 (0.52–0.92)</b> |
| Smoking status                        | <b>1.73 (1.19–2.52)</b> |
| Number of alcoholic drinking per week | 0.57 (0.33–0.97)        |
| History of diabetes                   | 2.33 (0.22–24.33)       |
| BMI                                   | 1.21 (0.82–1.79)        |
| Education                             | <b>1.96 (1.19–3.25)</b> |
| Serum cotinine ( $\text{nmol/L}$ )    | 1.00 (1.000–1.001)      |

|                                                             |                  |
|-------------------------------------------------------------|------------------|
| Serum eGFR (mL/min/1.73 m <sup>2</sup> )                    | 1.01 (0.99–1.04) |
| Serum pyridoxal 5'-phosphate concentration (nmol/L)         | 0.45 (0.53–1.04) |
| Total methyl donor (sum of choline, betaine and methionine) | 0.77 (0.56–1.06) |

**Table S5.** Spearman Correlation Coefficients between Energy, Fat, Protein and Carbohydrate Intakes with Serine and Glycine among Controls in the Shanghai Cohort Study ( $n = 258$ ).

|                             | Serine                  |                 | Glycine                 |                 |
|-----------------------------|-------------------------|-----------------|-------------------------|-----------------|
|                             | Correlation Coefficient | <i>P</i> -value | Correlation Coefficient | <i>P</i> -value |
| Energy intake (Kcal/day)    | −0.03248                | 0.60            | 0.06031                 | 0.33            |
| Fat intake (g/day)          | −0.02358                | 0.71            | 0.01287                 | 0.84            |
| Protein intake (g/day)      | −0.02180                | 0.73            | −0.05174                | 0.41            |
| Carbohydrate intake (g/day) | −0.06022                | 0.33            | −0.01978                | 0.75            |
